# Supplementary material for: Targeting hypoxia in cancer therapy
Source: Springer Nature journal article supplement (doi:10.1038/nrc3064), 2011-05-24
Supplement: 41568_2011_BFnrc3064_MOESM168_ESM.pdf [file 41568_2011_BFnrc3064_MOESM168_ESM.pdf]

**Table 1** | Mechanisms of resistance (and sensitivity) of hypoxic cells to cytotoxic therapy

| Effect of hypoxia                                        | Resistance/sensitivity | Mechanism                                 | Agents affected                                  | Example                                                               | Ref |
|----------------------------------------------------------|------------------------|-------------------------------------------|--------------------------------------------------|-----------------------------------------------------------------------|-----|
| Lack of oxidation of DNA free radicals by O <sub>2</sub> | Resistance             | Failure to induce DNA breaks              | Ionising radiation                               | 2-3-fold increase in radiation dose required for equivalent cell kill | 1   |
|                                                          |                        |                                           | DNA-breaking antibiotics                         | Bleomycin                                                             | 2   |
| Cell cycle arrest in G1 or G2 phase                      | Resistance             | Repair before progression to S or M phase | Cycle-selective chemotherapy drugs               | 5-fluorouracil                                                        | 3   |
| Cell cycle arrest in S-phase                             | Sensitivity            | Collapse of stalled replication forks     | PARP-1 inhibitors <sup>a</sup>                   | ABT-888                                                               | 4   |
| Distance from vasculature (indirect)                     | Resistance             | Compromised drug exposure                 | Drugs extensively bound in tumour cells          | Taxanes                                                               | 5   |
| Extracellular acidification (indirect)                   | Resistance             | decreased uptake                          | Basic drugs                                      | Doxorubicin                                                           | 6   |
|                                                          | Sensitivity            | Increased uptake                          | Acidic drugs                                     | Chlorambucil                                                          | 7   |
| Resistance to apoptosis                                  | Resistance             | Genetic selection of TP53 mutants         | Multiple                                         |                                                                       | 8   |
|                                                          |                        | Downregulation of Bid,Bax                 | Multiple                                         | Etoposide                                                             | 9   |
| Genomic instability                                      | Resistance             | Mutagenesis <sup>10</sup>                 | Multiple                                         | DHFR amplification and methotrexate                                   | 11  |
| Suppression of DNA repair                                | Resistance             | Downregulation of MMR                     | DNA methylating agents                           |                                                                       | 12  |
|                                                          | Sensitivity            | Downregulation of NER                     | Bulky DNA monoalkylating and crosslinking agents |                                                                       | 13  |
|                                                          |                        | Downregulation of HR                      | DNA crosslinking agents                          | Cisplatin                                                             | 114 |
| HIF-1 stabilisation                                      | Resistance             | Expression of ABC transporters            | ABC transporter substrates                       | MDR1 and doxorubicin                                                  | 15  |
|                                                          |                        | Downregulation of NHEJ                    | DNA double strand breaking agents                | Etoposide                                                             | 16  |

<sup>a</sup>Also sensitised by downregulation of HR under hypoxia. DHFR, dihydrofolate reductase; NHEJ, non-homologous end joining; HR, homologous recombination repair; MMR, mismatch repair; PARP, poly(ADP-ribose) polymerase

**Table 2** | Representative examples of the prognostic and predictive significance of hypoxia in human cancer

| Measure of hypoxia   | Probe                      | Clinical setting                                       | Outcome for hypoxic tumours                                                  | Ref |
|----------------------|----------------------------|--------------------------------------------------------|------------------------------------------------------------------------------|-----|
| Oxygen concentration | Eppendorf oxygen electrode | Chemoradiation of advanced HNSCC                       | Worse OS                                                                     | 17  |
|                      |                            | Irradiation of soft tissue sarcomas before surgery     | Worse DFS due to higher rate of distant metastasis                           | 18  |
|                      |                            | Brachytherapy irradiation of localised prostate cancer | Decreased biochemical control (PSA)                                          | 19  |
|                      |                            | Cervical carcinoma                                     | Worse DFS in node negative patients due to higher rate of distant metastases | 20  |
| Endogenous markers   | HIF1 $\alpha$              | Lymph node negative breast cancer                      | Worse OS                                                                     | 21  |
|                      | HIF1 $\alpha$              | BRCA-1 mutant breast cancer                            | Worse DFS                                                                    | 22  |
|                      | HIF2 $\alpha$ , CA-9       | CHART trial in HNSCC                                   | Worse local control and OS                                                   | 23  |
|                      | CA-9                       | Adjuvant chemotherapy of breast cancer                 | Worse OS                                                                     | 24  |
|                      | Osteopontin                | Radiotherapy for HNSCC                                 | Nimorazole (hypoxic radiosensitiser) improved local control and OS           | 25  |
|                      | Lysyl oxidase (LOX)        | Breast cancer                                          | Worse metastasis-free survival                                               | 26  |
|                      | Hypoxic gene signature     | HNSCC, breast cancer                                   | Worse outcome, multiple endpoints.                                           | 27  |
|                      | Hypoxic gene signature     | Hepatocellular carcinoma                               | Worse OS                                                                     | 28  |
| Exogenous probes     | Pimonidazole               | Radiotherapy for advanced HNSCC                        | Worse local control                                                          | 29  |
|                      | EF5                        | Post-surgical irradiation of HNSCC                     | Worse DFS                                                                    | 30  |

CHART, continuous hyperfractionated accelerated radiotherapy; DSF, disease-free survival; EF5, pentafluorinated etanidazole; HNSCC, head and neck squamous cell carcinoma; OS, overall survival; PFS, progression free survival; PSA, prostate specific antigen

**Table 3** | Bioreductive prodrugs of DNA-reactive cytotoxins recently or currently in clinical development.

| Prodrug                       | Clinical status                | Company/ Institution  | Chemical class            | Mechanism of activation <sup>a</sup> | Mechanism of cytotoxicity     | One-electron reductases  | Two-electron reductases | K <sub>O<sub>2</sub></sub> (μM) | Ref |
|-------------------------------|--------------------------------|-----------------------|---------------------------|--------------------------------------|-------------------------------|--------------------------|-------------------------|---------------------------------|-----|
| Tirapazamine (SR 4233)        | Phase III, cervix (Closed)     | SRI International/NCI | Aromatic <i>N</i> -oxide  | 1, 3 [R•]                            | Complex DNA damage            | CYPOR, iNOS              | NQO-1 <sup>b</sup>      | ~ 1                             | 31  |
| Apaziquone (EO9)              | Phase III, bladder (Closed)    | Spectrum              | Quinone                   | 1,4 [X,Y]                            | ICL                           | CYPOR                    | NQO-1                   |                                 | 32  |
| TH-302                        | Phase I/II, multiple (active)  | Threshold             | Nitro                     | 1, 3 [D]                             | ICL                           | CYPOR                    |                         | ~10 <sup>c</sup>                | 33  |
| PR-104                        | Phase I/II, leukaemia (active) | Proacta/U. Auckland   | Nitro                     | 1/2, 4,5,6 [Y,Z]                     | ICL                           | CYPOR, iNOS, MTRR, NDOR1 | AKR1C3                  | ~0.1                            | 34  |
| Banaxtrone (AQ4N)             | Recent Phase I/II              | Novacea               | Aliphatic <i>N</i> -oxide | 2, 5 [Y]                             | TopoII                        | iNOS                     | CYP3A4, CYP2S1          |                                 | 35  |
| Prolarix (CB 1954 + EP-0152R) | Phase II, HCC (discontinued)   | BTG                   | Nitro                     | 1/2,4,5,6 [Y,Z]                      | ICL                           | CYPOR, iNOS              | NQO-1, NQO-2            |                                 | 36  |
| RH1                           | Recent Phase I                 | CRUK                  | Quinone                   | 1,4 [X,Y]                            | ICL                           |                          | NQO-1, NQO-2            |                                 | 37  |
| NLCQ-1                        | Preclinical                    | Evanston Hospital     | Nitro                     | 1,4,5                                | TopoII or Multiple?           | CYPOR                    |                         | ~1 <sup>c</sup>                 | 38  |
| SN30000 (CEN-209)             | Preclinical                    | Centella/U. Auckland  | Aromatic <i>N</i> -oxide  | 1,3 [R•]                             | Complex DNA damage            | CYPOR                    |                         | ~ 1                             | 39  |
| SN29730                       | Preclinical                    | U. Auckland           | Nitro                     | 1, 4,5,6 [Z]                         | Adenine <i>N</i> 3 alkylation | CYPOR                    |                         |                                 | 40  |
| KS119W                        | Preclinical                    | Yale U.               | Nitro                     | 1,4,5,6 [D]                          | Guanine O6 ICL                | B5R, CYPOR               |                         |                                 | 41  |

See FIG. 2B for additional chemical structures. <sup>a</sup>Reaction numbers refer to FIG. 2A. Active cytotoxins (X,Y etc in FIG. 2A) are shown in square brackets. <sup>b</sup>Detoxifying. <sup>c</sup>Gas phase O<sub>2</sub> concentration <sup>42</sup> (K<sub>O<sub>2</sub></sub> values of 2-nitroimidazoles are typically much lower based on solution oxygen concentrations). AKR, aldo-keto reductase; B5R, NADH:cytochrome b5 reductase, CYP, cytochrome P450; CYPOR, NADPH:cytochrome P450 oxidoreductase; HCC, hepatocellular carcinoma; NDOR1, NADPH-dependent diflavin oxidoreductase-1; ICL, DNA interstrand crosslink; iNOS, inducible nitric oxide synthase; MTRR, methionine synthase reductase

**Table 4** | Representative examples of pharmacological approaches to molecular targets in hypoxic cells.

| Pathway                          | Target             | Agent                              | Class                              | Ref   |
|----------------------------------|--------------------|------------------------------------|------------------------------------|-------|
| <b>HIF-1a expression.</b>        | HIF antisense mRNA | EZN-2698                           | RNA oligonucleotide                | 43    |
|                                  | Topoisomerase I    | Topotecan                          | Camptothecan analogues             | 44    |
|                                  | Multiple           | PX-478                             | Melphalan N-oxide                  | 45    |
|                                  | Translation        | Digoxin                            | Cardiac glycoside                  | 46    |
|                                  | HSP90              | Geldanamycin, 17-AAG               | Benzoquinone ansamycin antibiotics | 47    |
| <b>HIF-1 transcription</b>       | HIF-p300 binding   | Chetomin and analogues             | Dithiodiketopiperazine             | 48    |
|                                  | Thioredoxin-1      | PX12                               | Imidazole disulfide                | 49    |
|                                  |                    | PMX290                             | Indoloquinol                       | 50    |
|                                  | DNA binding        | Echinomycin                        | DNA intercalator                   | 51    |
| <b>HIF-1 target genes</b>        | CA-9/CA-12         | Aryl sulfonamides                  | Sulfonamide zinc binders           | 52    |
|                                  | GLUT-1             | Glufosfamide                       | Glucose isophosphoramidate mustard | 53    |
|                                  |                    | 2-GLU-SNAP                         | Glucose SNAP conjugate             | 54    |
|                                  |                    | Fasentin                           | Oxobutanilide                      | 55    |
|                                  |                    | STF-31154                          | Unknown                            | 56    |
|                                  | Hexokinase II      | 5TDG, 2DG, 2FDG                    | Glycolysis inhibitors              | 57-59 |
|                                  | MCT1               | $\alpha$ -Cyano-4-hydroxycinnamate | Lactate transport inhibitor        | 60    |
| <b>Receptor tyrosine kinases</b> | VEGFR              | Bevacizumab                        | Monoclonal antibody                | 61    |

|                            |                   |                        |                                                       |    |
|----------------------------|-------------------|------------------------|-------------------------------------------------------|----|
|                            | EGFR              | Gefitinib, erlotinib   | ATP competitive kinase inhibitors                     | 62 |
|                            |                   | Cetuximab              | Monoclonal antibody                                   | 63 |
| <b>Ras-MAPK signalling</b> | BRAF              | Sorafenib              | ATP competitive kinase inhibitor                      | 64 |
| <b>mTOR</b>                | mTORC1            | Rapamycin, everolimus  | Allosteric binders of FKBP12-rapamycin binding domain | 65 |
|                            |                   | WYE-125132             | ATP-competitive mTOR kinase inhibitor                 | 66 |
|                            | Autophagy         | Chloroquine            | Lysosomal pH                                          | 67 |
| <b>UPR</b>                 | HSP90             | Geldanamycin, 17-AAG   | Benzoquinone ansamycin antibiotic                     | 68 |
|                            | IRE1 endonuclease | Salicylaldehydes       | IRE1 inhibitor                                        | 69 |
|                            | 26S proteasome    | Bortezomib             | Boronic acid tripeptide                               | 70 |
|                            |                   | Nelfinavir, ritonavir  | HIV protease inhibitors                               | 71 |
|                            | SERCA             | 2,5-Dimethyl celecoxib | Celecoxib analogue                                    | 72 |

Abbreviations: CA-9, carbonic anhydrase 9; EGFR, epidermal growth factor receptor; FKBP12, FK506 binding protein-12; HIV, human immunodeficiency virus; HSP90, heat shock protein 90; IRE1, inositol requiring endonuclease 1; MAPK, mitogen-activated protein kinase; MCT1, monocarboxylate [transporter](#) 1; mTOR, molecular target of rapamycin; ; SERCA, sarco/endoplasmic reticulum Ca<sup>2+</sup>-ATPase; SNAP, S-nitroso-acetyl-penicillamine; VEGFR, vascular endothelial growth factor receptor.

## Reference List

1. Gray, L. H., Conger, A. D., Ebert, M., Hornsey, S. & Scott, O. C. Concentration of oxygen dissolved in tissues at the time of irradiation as a factor in radiotherapy. *Br. J. Radiol.* **26**, 638-648 (1953).
2. Teicher, B. A., Lazo, J. S. & Sartorelli, A. C. Classification of antineoplastic agents by their selective toxicities toward oxygenated and hypoxic tumor cells. *Cancer Res.* **41**, 73-81 (1981).
3. Yoshida, S. *et al.* Hypoxia induces resistance to 5-fluorouracil in oral cancer cells via G(1) phase cell cycle arrest. *Oral Oncol.* **45**, 109-115 (2009).
4. Chan, N. *et al.* Contextual synthetic lethality of cancer cell kill based on the tumor microenvironment. *Cancer Res.* **70**, 8045-8054 (2010).
5. Kyle, A. H., Huxham, L. A., Yeoman, D. M. & Minchinton, A. I. Limited tissue penetration of taxanes: a mechanism for resistance in solid tumors. *Clin. Cancer Res.* **13**, 2804-2810 (2007).
6. Gerweck, L. E., Kozin, S. V. & Stocks, S. J. The pH partition theory predicts the accumulation and toxicity of doxorubicin in normal and low-pH-adapted cells. *Br. J. Cancer.* **79**, 838-842 (1999).
7. Brophy, G. T. & Sladek, N. E. Influence of pH on the cytotoxic activity of chlorambucil. *Biochem. Pharmacol.* **32**, 79-84 (1983).
8. Graeber, T. G. *et al.* Hypoxia-mediated selection of cells with diminished apoptotic potential in solid tumours. *Nature* **379**, 88-91 (1996).
9. Erler, J. T. *et al.* Hypoxia-mediated down-regulation of Bid and Bax in tumors occurs via hypoxia-inducible factor 1-dependent and -independent mechanisms and contributes to drug resistance. *Mol. Cell. Biol.* **24**, 2875-2889 (2004).
10. Bindra, R. S. & Glazer, P. M. Genetic instability and the tumor microenvironment: towards the concept of microenvironment-induced mutagenesis. *Mutat. Res.* **569**, 75-85 (2005).
11. Rice, G. C., Hoy, C. & Schimke, R. T. Transient hypoxia enhances the frequency of dihydrofolate reductase gene amplification in Chinese hamster ovary cells. *Proc. Natl Acad. Sci. USA* **83**, 5978-5982 (1986).
12. Bindra, R. S. & Glazer, P. M. Co-repression of mismatch repair gene expression by hypoxia in cancer cells: role of the Myc/Max network. *Cancer Lett.* **252**, 93-103 (2007).
13. Yuan, J., Narayanan, L., Rockwell, S. & Glazer, P. M. Diminished DNA repair and elevated mutagenesis in mammalian cells exposed to hypoxia and low pH. *Cancer Res.* **60**, 4372-4376 (2000).

14. Chan, N. *et al.* Chronic hypoxia decreases synthesis of homologous recombination proteins to offset chemoresistance and radioresistance. *Cancer Res.* **68**, 605-614 (2008).
15. Comerford, K. M. *et al.* Hypoxia-inducible factor-1-dependent regulation of the multidrug resistance (MDR1) gene. *Cancer Res.* **62**, 3387-3394 (2002).
16. Wirthner, R., Wrann, S., Balamurugan, K., Wenger, R. H. & Stiehl, D. P. Impaired DNA double-strand break repair contributes to chemoresistance in HIF-1 alpha-deficient mouse embryonic fibroblasts. *Carcinogenesis* **29**, 2306-2316 (2008).
17. Nordsmark, M. *et al.* Prognostic value of tumor oxygenation in 397 head and neck tumors after primary radiation therapy. An international multi-center study. *Radiother. Oncol.* **77**, 18-24 (2005).
18. Brizel, D. M. *et al.* Tumor oxygenation predicts for the likelihood of distant metastases in human soft tissue sarcoma. *Cancer Res.* **56**, 941-943 (1996).
19. Movsas, B. *et al.* Hypoxic prostate/muscle pO<sub>2</sub> ratio predicts for biochemical failure in patients with prostate cancer: preliminary findings. *Urology* **60**, 634-639 (2002).
20. Fyles, A. *et al.* Tumor hypoxia has independent predictor impact only in patients with node-negative cervix cancer. *J. Clin. Oncol.* **20**, 680-687 (2002).
21. Bos, R. *et al.* Levels of hypoxia-inducible factor-1alpha independently predict prognosis in patients with lymph node negative breast carcinoma. *Cancer* **97**, 1573-1581 (2003).
22. Yan, M., Rayoo, M., Takano, E. A., Thorne, H. & Fox, S. B. BRCA1 tumours correlate with a HIF-1 $\alpha$  phenotype and have a poor prognosis through modulation of hydroxylase enzyme profile expression. *Br. J. Cancer* **101**, 1168-1174 (2009).
23. Koukourakis, M. I. *et al.* Endogenous markers of two separate hypoxia response pathways (hypoxia inducible factor 2 alpha and carbonic anhydrase 9) are associated with radiotherapy failure in head and neck cancer patients recruited in the CHART randomized trial. *J. Clin. Oncol.* **24**, 727-735 (2006).
24. Tan, E. Y. *et al.* The key hypoxia regulated gene CAIX is upregulated in basal-like breast tumours and is associated with resistance to chemotherapy. *Br. J. Cancer* **100**, 405-411 (2009).
25. Overgaard, J. *et al.* Plasma osteopontin, hypoxia, and response to the hypoxia sensitiser nimorazole in radiotherapy of head and neck cancer: results from the DAHANCA 5 randomised double-blind placebo-controlled trial. *Lancet Oncol.* **6**, 757-764 (2005).
26. Erler, J. T. *et al.* Lysyl oxidase is essential for hypoxia-induced metastasis. *Nature* **440**, 1222-1226 (2006).

27. Buffa, F. M., Harris, A. L., West, C. M. & Miller, C. R. Large meta-analysis of multiple cancers reveals a common, compact and highly prognostic hypoxia metagene. *Br. J. Cancer* **102**, 428-435 (2010).
28. van Malenstein, H. *et al.* A Seven-Gene Set Associated with Chronic Hypoxia of Prognostic Importance in Hepatocellular Carcinoma. *Clin. Cancer Res.* **16**, 4278-4288 (2010).
29. Kaanders, J. H. *et al.* Pimonidazole binding and tumor vascularity predict for treatment outcome in head and neck cancer. *Cancer Res.* **62**, 7066-7074 (2002).
30. Evans, S. M. *et al.* Patterns and levels of hypoxia in head and neck squamous cell carcinomas and their relationship to patient outcome. *Int. J. Radiat. Oncol. Biol. Phys.* **69**, 1024-1031 (2007).
31. Rischin, D. *et al.* Tirapazamine, cisplatin, and radiation versus cisplatin and radiation for advanced squamous cell carcinoma of the head and neck (TROG 02.02, HeadSTART): A phase III trial of the Trans-Tasman Radiation Oncology Group. *J. Clin. Oncol.* **28**, 2989-2995 (2010).
32. Jain, A. *et al.* Response of multiple recurrent TaT1 bladder cancer to intravesical apaziquone (EO9): comparative analysis of tumor recurrence rates. *Urology* **73**, 1083-1086 (2009).
33. Duan, J. X. *et al.* Potent and highly selective hypoxia-activated achiral phosphoramidate mustards as anticancer drugs. *J. Med. Chem.* **51**, 2412-2420 (2008).
34. Patterson, A. V. *et al.* Mechanism of action and preclinical antitumor activity of the novel hypoxia-activated DNA crosslinking agent PR-104. *Clin. Cancer Res.* **13**, 3922-3932 (2007).
35. Patterson, L. H. Bioreductively activated antitumor N-oxides: the case of AQ4N, a unique approach to hypoxia-activated cancer chemotherapy. *Drug Metab. Rev.* **34**, 581-592 (2002).
36. Knox, R. J. & Chen, S. Quinone reductase-mediated nitro-reduction: clinical applications. *Methods Enzymol.* **382**, 194-221 (2004).
37. Danson, S. J. *et al.* Phase I pharmacokinetic and pharmacodynamic study of the bioreductive drug RH1. *Ann. Oncol.* doi:10.1093/annonc/mdq638 (2011).
38. Papadopoulou, M. V. & Bloomer, W. D. NLCQ-1 (NSC 709257): exploiting hypoxia with a weak DNA-intercalating bioreductive drug. *Clin. Cancer Res.* **9**, 5714-5720 (2003).
39. Hicks, K. O. *et al.* Pharmacokinetic/pharmacodynamic modeling identifies SN30000 and SN29751 as tirapazamine analogues with improved tissue penetration and hypoxic cell killing in tumors. *Clin. Cancer Res.* **16**, 4946-4957 (2010).

40. Tercel, M. *et al.* Selective treatment of hypoxic tumor cells in vivo: Phosphate pre-prodrugs of nitro analogues of the duocarmycins. *Angew. Chem. Int. Ed.* **50**, 2606-2609 (2011).
41. Baumann, R. P. *et al.* Reductive activation of the prodrug 1,2-bis(methylsulfonyl)-1-(2-chloroethyl)-2-[[1-(4-nitrophenyl)ethoxy]carbonyl]hydrazine (KS119) selectively occurs in oxygen-deficient cells and overcomes O(6)-alkylguanine-DNA alkyltransferase mediated KS119 tumor cell resistance. *Biochem. Pharmacol.* **79**, 1553-1561 (2010).
42. Hu, J. *et al.* Targeting the multiple myeloma hypoxic niche with TH-302, a hypoxia-activated prodrug. *Blood* **116**, 1524-1527 (2010).
43. Greenberger, L. M. *et al.* A RNA antagonist of hypoxia-inducible factor-1alpha, EZN-2968, inhibits tumor cell growth. *Mol. Cancer Ther.* **7**, 3598-3608 (2008).
44. Rapisarda, A. *et al.* Increased antitumor activity of bevacizumab in combination with hypoxia inducible factor-1 inhibition. *Mol. Cancer Ther.* **8**, 1867-1877 (2009).
45. Schwartz, D. L. *et al.* Radiosensitization and stromal imaging response correlates for the HIF-1 inhibitor PX-478 given with or without chemotherapy in pancreatic cancer. *Mol. Cancer Ther.* **9**, 2057-2067 (2010).
46. Zhang, H. *et al.* Digoxin and other cardiac glycosides inhibit HIF-1alpha synthesis and block tumor growth. *Proc. Natl Acad. Sci. USA* **105**, 19579-19586 (2008).
47. Isaacs, J. S. *et al.* Hsp90 regulates a von Hippel Lindau-independent hypoxia-inducible factor-1 alpha-degradative pathway. *J. Biol. Chem.* **277**, 29936-29944 (2002).
48. Staab, A. *et al.* Effects of HIF-1 inhibition by chetomin on hypoxia-related transcription and radiosensitivity in HT 1080 human fibrosarcoma cells. *BMC Cancer* **7**, 213 (2007).
49. Ramanathan, R. K. *et al.* A Phase I pharmacokinetic and pharmacodynamic study of PX-12, a novel inhibitor of thioredoxin-1, in patients with advanced solid tumors. *Clin. Cancer Res.* **13**, 2109-2114 (2007).
50. Jones, D. T., Pugh, C. W., Wigfield, S., Stevens, M. F. & Harris, A. L. Novel thioredoxin inhibitors paradoxically increase hypoxia-inducible factor-alpha expression but decrease functional transcriptional activity, DNA binding, and degradation. *Clin. Cancer Res.* **12**, 5384-5394 (2006).
51. Kong, D. *et al.* Echinomycin, a small-molecule inhibitor of hypoxia-inducible factor-1 DNA-binding activity. *Cancer Res.* **65**, 9047-9055 (2005).
52. Guler, O. O., De Simone, G. & Supuran, C. T. Drug design studies of the novel antitumor targets carbonic anhydrase IX and XII. *Curr. Med. Chem.* **17**, 1516-1526 (2010).

53. Pohl, J. *et al.* D-19575 - A sugar-linked isophosphoramidate mustard derivative exploiting transmembrane glucose transport. *Cancer Chemother. Pharmacol.* **35**, 364-370 (1995).
54. Cantuaria, G. *et al.* Antitumor activity of a novel glyco-nitric oxide conjugate in ovarian carcinoma. *Cancer* **88**, 381-388 (2000).
55. Wood, T. E. *et al.* A novel inhibitor of glucose uptake sensitizes cells to FAS-induced cell death. *Mol. Cancer Ther.* **7**, 3546-3555 (2008).
56. Lai, E. W., Chan, D. A., Hay, M. P. & Giaccia, A. J. Selective cytotoxic targeting of von Hippel-Lindau-deficient renal carcinoma cells. *Proc. Am. Assoc. Cancer Res.* **51**, Abstract 67 (2010).
57. Song, C. W., Clement, J. J. & Levitt, S. H. Preferential cytotoxicity of 5-thio-D-glucose against hypoxic tumor cells. *J. Natl Cancer Instit.* **57**, 603-605 (1976).
58. Lampidis, T. J. *et al.* Efficacy of 2-halogen substituted D-glucose analogs in blocking glycolysis and killing "hypoxic tumor cells". *Cancer Chemother. Pharmacol.* **58**, 725-734 (2006).
59. Kurtoglu, M., Maher, J. C. & Lampidis, T. J. Differential toxic mechanisms of 2-deoxy-D-glucose versus 2-fluorodeoxy-D-glucose in hypoxic and normoxic tumor cells. *Antioxid. Redox Signal.* **9**, 1383-1390 (2007).
60. Sonveaux, P. *et al.* Targeting lactate-fueled respiration selectively kills hypoxic tumor cells in mice. *J. Clin. Invest.* **118**, 3930-3942 (2008).
61. Calvani, M., Trisciuglio, D., Bergamaschi, C., Shoemaker, R. H. & Melillo, G. Differential involvement of vascular endothelial growth factor in the survival of hypoxic colon cancer cells. *Cancer Res.* **68**, 285-291 (2008).
62. Pore, N. *et al.* EGFR tyrosine kinase inhibitors decrease VEGF expression by both hypoxia-inducible factor (HIF)-1-independent and HIF-1-dependent mechanisms. *Cancer Res.* **66**, 3197-3204 (2006).
63. Luwor, R. B., Lu, Y., Li, X., Mendelsohn, J. & Fan, Z. The anti-epidermal growth factor receptor monoclonal antibody cetuximab/C225 reduces hypoxia-inducible factor-1 alpha, leading to transcriptional inhibition of vascular endothelial growth factor expression. *Oncogene* **24**, 4433-4441 (2005).
64. Kumar, S. M. *et al.* Mutant V600E BRAF increases hypoxia inducible factor-1alpha expression in melanoma. *Cancer Res.* **67**, 3177-3184 (2007).
65. Pencreach, E. *et al.* Marked activity of irinotecan and rapamycin combination toward colon cancer cells in vivo and in vitro is mediated through cooperative modulation of the mammalian target of rapamycin/hypoxia-inducible factor-1alpha axis. *Clin. Cancer Res.* **15**, 1297-1307 (2009).
66. Yu, K. *et al.* Beyond rapalog therapy: preclinical pharmacology and antitumor activity of WYE-125132, an ATP-competitive and specific inhibitor of mTORC1 and mTORC2. *Cancer Res.* **70**, 621-631 (2010).

67. Rouschop, K. M. *et al.* The unfolded protein response protects human tumor cells during hypoxia through regulation of the autophagy genes MAP1LC3B and ATG5. *J. Clin. Invest.* **120**, 127-141 (2010).
68. Mabeesh, N. J. *et al.* Geldanamycin induces degradation of hypoxia-inducible factor 1alpha protein via the proteosome pathway in prostate cancer cells. *Cancer Res.* **62**, 2478-2482 (2002).
69. Volkmann, K. *et al.* Potent and selective inhibitors of the inositol-requiring enzyme 1 endoribonuclease. *J. Biol. Chem.* **286**, 12743-12755 (2011).
70. Fels, D. R. *et al.* Preferential cytotoxicity of bortezomib toward hypoxic tumor cells via overactivation of endoplasmic reticulum stress pathways. *Cancer Res.* **68**, 9323-9330 (2008).
71. Gills, J. J. *et al.* Nelfinavir, A lead HIV protease inhibitor, is a broad-spectrum, anticancer agent that induces endoplasmic reticulum stress, autophagy, and apoptosis in vitro and in vivo. *Clin. Cancer Res.* **13**, 5183-5194 (2007).
72. Pyrko, P. *et al.* Calcium-activated endoplasmic reticulum stress as a major component of tumor cell death induced by 2,5-dimethyl-celecoxib, a non-coxib analogue of celecoxib. *Mol. Cancer Ther.* **6**, 1262-1275 (2007).
